# Supplementary material for: Vitamin B6 reduces hippocampal apoptosis in experimental pneumococcal meningitis
Source: PubMed Central journal article supplement (PMC3765858; doi:10.1186/1471-2334-13-393), 2013-08-27

MAPK SIGNALING PATHWAY

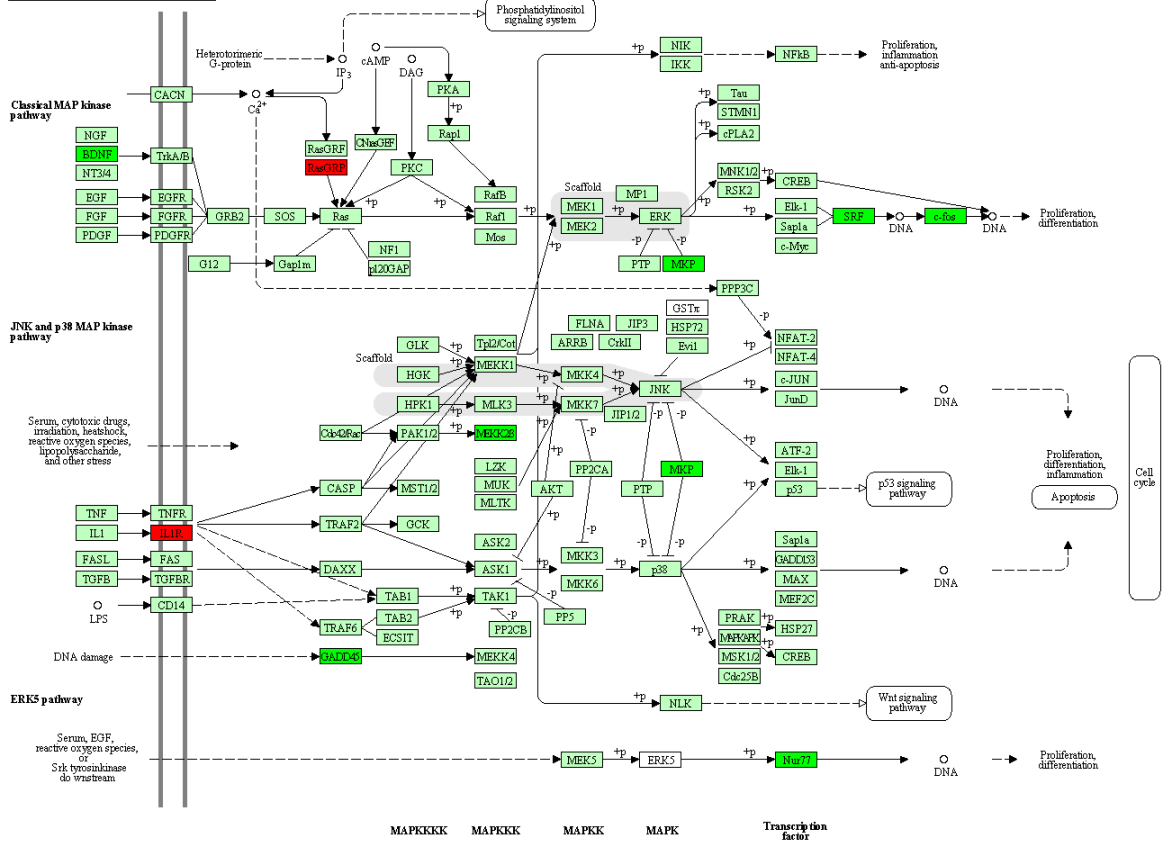

Supplement: 1471-2334-13-393-S2.pdf [file 1471-2334-13-393-S2.pdf]
