# Supplementary material for: Vitamin B6 reduces hippocampal apoptosis in experimental pneumococcal meningitis
Source: PubMed Central journal article supplement (PMC3765858; doi:10.1186/1471-2334-13-393), 2013-08-27

CIRCADIAN RHYTHM

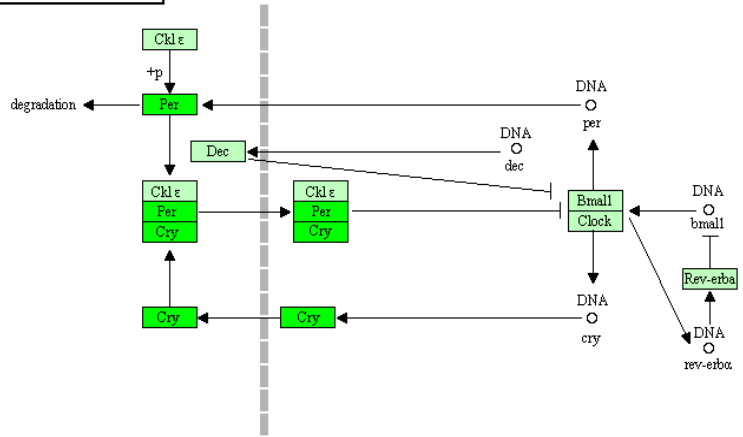

Supplement: 1471-2334-13-393-S3.pdf [file 1471-2334-13-393-S3.pdf]
